# Supplementary material for: Guided desaturation of unactivated aliphatics
Source: Springer Nature journal article supplement (doi:10.1038/nchem.1385), 2012-07-06
Supplement: 41557_2012_BFnchem1385_MOESM85_ESM.cif [file 41557_2012_BFnchem1385_MOESM85_ESM.cif]

 
data_baran206

_publ_section_title
;
Guided desaturation of unactivated aliphatics
;
_publ_requested_journal 'Nature Chemistry'
_publ_contact_author_name        'Abraham Mendoza'
_publ_contact_author_address     
;
      The Scripps Research Institute
      10550 North Torrey Pines Road
      La Jolla, California 92037
      United States
;
_publ_contact_author_email       amendoza@scripps.edu
_publ_contact_author_phone       +18587847372
_publ_contact_author_fax         +18587847375
_publ_contact_letter
;
La Jolla 12/15/2011

Please receive the CIF for compound 44

Thank you very much.

A. Mendoza.
;
loop_
_publ_author_name
_publ_author_address
     'Voica, Ana-Florina'
;     Instituto Universitario de Qu\'imica Organomet\'alica "Enrique Moles"
      Unidad Asociada al CSIC
      Universidad de Oviedo
      Juli\'an Claver\'ia 8
      33006-Oviedo
      Spain
;     'Gutekunst, Will R.'
;     Instituto Universitario de Qu\'imica Organomet\'alica "Enrique Moles"
      Unidad Asociada al CSIC
      Universidad de Oviedo
      Juli\'an Claver\'ia 8
      33006-Oviedo
      Spain
;     'Mendoza, Abraham'
;     Instituto Universitario de Qu\'imica Organomet\'alica "Enrique Moles"
      Unidad Asociada al CSIC
      Universidad de Oviedo
      Juli\'an Claver\'ia 8
      33006-Oviedo
      Spain
;    'Otero, Jorge'
;     Instituto Universitario de Qu\'imica Organomet\'alica "Enrique Moles"
      Unidad Asociada al CSIC
      Universidad de Oviedo
      Juli\'an Claver\'ia 8
      33006-Oviedo
      Spain
;    'Baran, Phil S.'
;     Department of Chemistry
      The Scripps Research Institute
      10550 North Torrey Pines Road
      La Jolla, California 92037
      United States
;   
  
_audit_creation_method            SHELXL-97 
_chemical_name_systematic 
; 
 ? 
; 
_chemical_name_common             ? 
_chemical_melting_point           ? 
_chemical_formula_moiety          
 'C27 H35 N O2 S'  
_chemical_formula_sum 
 'C27 H35 N O2 S' 
_chemical_formula_weight          437.62 
_chemical_absolute_configuration  'AD'
  
loop_ 
 _atom_type_symbol 
 _atom_type_description 
 _atom_type_scat_dispersion_real 
 _atom_type_scat_dispersion_imag 
 _atom_type_scat_source 
 'C'  'C'   0.0181   0.0091 
 'International Tables Vol C Tables 4.2.6.8 and 6.1.1.4' 
 'H'  'H'   0.0000   0.0000 
 'International Tables Vol C Tables 4.2.6.8 and 6.1.1.4' 
 'N'  'N'   0.0311   0.0180 
 'International Tables Vol C Tables 4.2.6.8 and 6.1.1.4' 
 'O'  'O'   0.0492   0.0322 
 'International Tables Vol C Tables 4.2.6.8 and 6.1.1.4' 
 'S'  'S'   0.3331   0.5567 
 'International Tables Vol C Tables 4.2.6.8 and 6.1.1.4' 
  
_symmetry_cell_setting            Orthorhombic 
_symmetry_space_group_name_H-M    P2(1)2(1)2(1) 
_symmetry_space_group_name_Hall   'P 2ac 2ab'  

loop_ 
 _symmetry_equiv_pos_as_xyz 
 'x, y, z' 
 'x+1/2, -y+1/2, -z' 
 '-x, y+1/2, -z+1/2' 
 '-x+1/2, -y, z+1/2' 
  
_cell_length_a                    7.4983(3) 
_cell_length_b                    9.7183(3) 
_cell_length_c                    32.9845(12) 
_cell_angle_alpha                 90.00 
_cell_angle_beta                  90.00 
_cell_angle_gamma                 90.00 
_cell_volume                      2403.61(15) 
_cell_formula_units_Z             4 
_cell_measurement_temperature     100(2) 
_cell_measurement_reflns_used     8707 
_cell_measurement_theta_min       2.68 
_cell_measurement_theta_max       65.00 
  
_exptl_crystal_description        blade 
_exptl_crystal_colour             colourless 
_exptl_crystal_size_max           0.33 
_exptl_crystal_size_mid           0.10 
_exptl_crystal_size_min           0.07 
_exptl_crystal_density_meas       'not measured'   
_exptl_crystal_density_diffrn     1.209 
_exptl_crystal_density_method     'not measured' 
_exptl_crystal_F_000              944 
_exptl_absorpt_coefficient_mu     1.365 
_exptl_absorpt_correction_type    multi-scan
_exptl_absorpt_correction_T_min   0.6615 
_exptl_absorpt_correction_T_max   0.9105 
_exptl_absorpt_process_details    SADABS 
  
_exptl_special_details 
; 
 ? 
; 
  
_diffrn_ambient_temperature       100(2) 
_diffrn_radiation_wavelength      1.54178 
_diffrn_radiation_type            CuK\a 
_diffrn_radiation_source          'fine-focus sealed tube' 
_diffrn_radiation_monochromator   graphite 
_diffrn_measurement_device_type   'Bruker APEX-II CCD' 
_diffrn_measurement_method        '\f and \w scans' 
_diffrn_reflns_number             9182 
_diffrn_reflns_av_R_equivalents   0.0462 
_diffrn_reflns_av_sigmaI/netI     0.0573 
_diffrn_reflns_limit_h_min        -5 
_diffrn_reflns_limit_h_max        8 
_diffrn_reflns_limit_k_min        -11 
_diffrn_reflns_limit_k_max        11 
_diffrn_reflns_limit_l_min        -35 
_diffrn_reflns_limit_l_max        38 
_diffrn_reflns_theta_min          2.68 
_diffrn_reflns_theta_max          65.00 
_reflns_number_total              3702 
_reflns_number_gt                 3648 
_reflns_threshold_expression      >2sigma(I) 
  
_computing_data_collection        'Bruker APEX2' 
_computing_cell_refinement        'Bruker SAINT' 
_computing_data_reduction         'Bruker SAINT' 
_computing_structure_solution     'SHELXS-97 (Sheldrick, 2008)' 
_computing_structure_refinement   'SHELXL-97 (Sheldrick, 2008)' 
_computing_molecular_graphics     'Bruker SHELXTL' 
_computing_publication_material   'Bruker SHELXTL' 
  
_refine_special_details 
; 
 Refinement of F^2^ against ALL reflections.  The weighted R-factor wR and 
 goodness of fit S are based on F^2^, conventional R-factors R are based 
 on F, with F set to zero for negative F^2^. The threshold expression of 
 F^2^ > 2sigma(F^2^) is used only for calculating R-factors(gt) etc. and is 
 not relevant to the choice of reflections for refinement.  R-factors based 
 on F^2^ are statistically about twice as large as those based on F, and R- 
 factors based on ALL data will be even larger. 
; 
  
_refine_ls_structure_factor_coef  Fsqd 
_refine_ls_matrix_type            full 
_refine_ls_weighting_scheme       calc 
_refine_ls_weighting_details 
 'calc w=1/[\s^2^(Fo^2^)+(0.0495P)^2^+0.4669P] where P=(Fo^2^+2Fc^2^)/3' 
_atom_sites_solution_primary      direct 
_atom_sites_solution_secondary    difmap 
_atom_sites_solution_hydrogens    geom 
_refine_ls_hydrogen_treatment     mixed
_refine_ls_extinction_method      none 
_refine_ls_extinction_coef        'not measured'  
_refine_ls_abs_structure_details 
 'Flack H D (1983), Acta Cryst. A39, 876-881' 
_refine_ls_abs_structure_Flack    0.053(15) 
_refine_ls_number_reflns          3702 
_refine_ls_number_parameters      289 
_refine_ls_number_restraints      1 
_refine_ls_R_factor_all           0.0356 
_refine_ls_R_factor_gt            0.0353 
_refine_ls_wR_factor_ref          0.0901 
_refine_ls_wR_factor_gt           0.0897 
_refine_ls_goodness_of_fit_ref    1.028 
_refine_ls_restrained_S_all       1.028 
_refine_ls_shift/su_max           0.001 
_refine_ls_shift/su_mean          0.000 
  
loop_ 
 _atom_site_label 
 _atom_site_type_symbol 
 _atom_site_fract_x 
 _atom_site_fract_y 
 _atom_site_fract_z 
 _atom_site_U_iso_or_equiv 
 _atom_site_adp_type 
 _atom_site_occupancy 
 _atom_site_symmetry_multiplicity 
 _atom_site_calc_flag 
 _atom_site_refinement_flags 
 _atom_site_disorder_assembly 
 _atom_site_disorder_group 
S1 S 0.01405(5) 0.51170(4) 0.765511(12) 0.01880(13) Uani 1 1 d . . . 
O1 O 0.10527(17) 0.38186(13) 0.76207(4) 0.0240(3) Uani 1 1 d . . . 
O2 O -0.17546(17) 0.51426(13) 0.76102(4) 0.0254(3) Uani 1 1 d . . . 
N1 N 0.0936(2) 0.61377(15) 0.73118(4) 0.0209(3) Uani 1 1 d D . . 
C1 C 0.1956(3) 0.7430(2) 0.93112(6) 0.0317(5) Uani 1 1 d . . . 
H1A H 0.1345 0.6887 0.9519 0.048 Uiso 1 1 calc R . . 
H1B H 0.1556 0.8389 0.9326 0.048 Uiso 1 1 calc R . . 
H1C H 0.3247 0.7389 0.9356 0.048 Uiso 1 1 calc R . . 
C2 C 0.1525(2) 0.6856(2) 0.88986(5) 0.0251(4) Uani 1 1 d . . . 
C3 C 0.1833(2) 0.5472(2) 0.88078(5) 0.0251(4) Uani 1 1 d . . . 
H3 H 0.2318 0.4885 0.9010 0.030 Uiso 1 1 calc R . . 
C4 C 0.1445(2) 0.49395(19) 0.84296(5) 0.0225(4) Uani 1 1 d . . . 
H4 H 0.1670 0.3998 0.8371 0.027 Uiso 1 1 calc R . . 
C5 C 0.0723(2) 0.58002(18) 0.81354(5) 0.0200(4) Uani 1 1 d . . . 
C6 C 0.2857(2) 0.64570(18) 0.73193(5) 0.0224(4) Uani 1 1 d . . . 
H6A H 0.3488 0.5727 0.7472 0.027 Uiso 1 1 calc R . . 
H6B H 0.3039 0.7336 0.7465 0.027 Uiso 1 1 calc R . . 
C7 C 0.3685(2) 0.65754(18) 0.68904(6) 0.0221(4) Uani 1 1 d . . . 
C8 C 0.3577(2) 0.51537(17) 0.66743(5) 0.0195(4) Uani 1 1 d . . . 
H8 H 0.2382 0.4767 0.6746 0.023 Uiso 1 1 calc R . . 
C9 C 0.3613(2) 0.52354(18) 0.62020(5) 0.0217(4) Uani 1 1 d . . . 
C10 C 0.3470(2) 0.37697(19) 0.60273(5) 0.0211(4) Uani 1 1 d . . . 
C11 C 0.2995(3) 0.35966(19) 0.56192(6) 0.0236(4) Uani 1 1 d . . . 
H11 H 0.2744 0.4387 0.5460 0.028 Uiso 1 1 calc R . . 
C12 C 0.2882(3) 0.2314(2) 0.54428(5) 0.0247(4) Uani 1 1 d . . . 
H12 H 0.2555 0.2238 0.5165 0.030 Uiso 1 1 calc R . . 
C13 C 0.3241(2) 0.11230(19) 0.56664(6) 0.0239(4) Uani 1 1 d . . . 
C14 C 0.3186(3) -0.0296(2) 0.54707(6) 0.0281(4) Uani 1 1 d . . . 
H14 H 0.3401 -0.0992 0.5688 0.034 Uiso 1 1 calc R . . 
C15 C 0.1374(3) -0.0600(2) 0.52827(7) 0.0382(5) Uani 1 1 d . . . 
H15A H 0.0442 -0.0496 0.5489 0.057 Uiso 1 1 calc R . . 
H15B H 0.1362 -0.1545 0.5178 0.057 Uiso 1 1 calc R . . 
H15C H 0.1152 0.0044 0.5060 0.057 Uiso 1 1 calc R . . 
C16 C 0.0419(2) 0.71798(18) 0.82159(6) 0.0229(4) Uani 1 1 d . . . 
H16 H -0.0061 0.7765 0.8013 0.027 Uiso 1 1 calc R . . 
C17 C 0.0822(2) 0.76921(19) 0.85951(6) 0.0244(4) Uani 1 1 d . . . 
H17 H 0.0614 0.8638 0.8651 0.029 Uiso 1 1 calc R . . 
C18 C 0.5592(3) 0.7092(2) 0.69657(6) 0.0273(4) Uani 1 1 d . . . 
H18A H 0.5550 0.8020 0.7081 0.041 Uiso 1 1 calc R . . 
H18B H 0.6247 0.7113 0.6709 0.041 Uiso 1 1 calc R . . 
H18C H 0.6197 0.6472 0.7155 0.041 Uiso 1 1 calc R . . 
C19 C 0.1997(3) 0.6106(2) 0.60694(5) 0.0238(4) Uani 1 1 d . . . 
H19A H 0.2105 0.6321 0.5777 0.029 Uiso 1 1 calc R . . 
H19B H 0.0893 0.5563 0.6108 0.029 Uiso 1 1 calc R . . 
C20 C 0.1854(3) 0.74272(19) 0.63047(6) 0.0249(4) Uani 1 1 d . . . 
H20 H 0.1160 0.8151 0.6192 0.030 Uiso 1 1 calc R . . 
C21 C 0.2636(3) 0.76425(19) 0.66582(5) 0.0237(4) Uani 1 1 d . . . 
H21 H 0.2530 0.8533 0.6775 0.028 Uiso 1 1 calc R . . 
C22 C 0.5317(3) 0.58972(19) 0.60269(6) 0.0265(4) Uani 1 1 d . . . 
H22A H 0.5326 0.6883 0.6090 0.040 Uiso 1 1 calc R . . 
H22B H 0.5340 0.5771 0.5732 0.040 Uiso 1 1 calc R . . 
H22C H 0.6368 0.5459 0.6147 0.040 Uiso 1 1 calc R . . 
C23 C 0.4671(3) -0.0449(2) 0.51551(6) 0.0381(5) Uani 1 1 d . . . 
H23A H 0.4514 0.0243 0.4942 0.057 Uiso 1 1 calc R . . 
H23B H 0.4619 -0.1371 0.5035 0.057 Uiso 1 1 calc R . . 
H23C H 0.5832 -0.0316 0.5286 0.057 Uiso 1 1 calc R . . 
C24 C 0.3705(2) 0.12894(19) 0.60718(5) 0.0216(4) Uani 1 1 d . . . 
H24 H 0.3937 0.0493 0.6230 0.026 Uiso 1 1 calc R . . 
C25 C 0.3844(2) 0.25834(19) 0.62550(5) 0.0201(4) Uani 1 1 d . . . 
C26 C 0.4399(2) 0.26565(18) 0.66977(5) 0.0216(4) Uani 1 1 d . . . 
H26A H 0.5412 0.2022 0.6743 0.026 Uiso 1 1 calc R . . 
H26B H 0.3394 0.2343 0.6869 0.026 Uiso 1 1 calc R . . 
C27 C 0.4943(2) 0.41053(18) 0.68279(5) 0.0221(4) Uani 1 1 d . . . 
H27A H 0.6135 0.4326 0.6716 0.027 Uiso 1 1 calc R . . 
H27B H 0.5015 0.4151 0.7127 0.027 Uiso 1 1 calc R . . 
H1 H 0.020(3) 0.681(2) 0.7265(8) 0.046(7) Uiso 1 1 d D . . 
  
loop_ 
 _atom_site_aniso_label 
 _atom_site_aniso_U_11 
 _atom_site_aniso_U_22 
 _atom_site_aniso_U_33 
 _atom_site_aniso_U_23 
 _atom_site_aniso_U_13 
 _atom_site_aniso_U_12 
S1 0.0231(2) 0.0173(2) 0.0160(2) -0.00005(15) -0.00124(15) -0.00126(17) 
O1 0.0317(7) 0.0185(6) 0.0217(6) -0.0008(5) -0.0023(6) -0.0019(5) 
O2 0.0267(6) 0.0272(6) 0.0221(6) 0.0029(5) -0.0023(5) -0.0032(6) 
N1 0.0260(8) 0.0199(7) 0.0167(7) 0.0010(6) -0.0007(6) 0.0019(6) 
C1 0.0289(10) 0.0440(12) 0.0221(9) -0.0082(9) 0.0001(8) -0.0022(10) 
C2 0.0190(8) 0.0362(10) 0.0200(9) -0.0048(8) 0.0019(7) -0.0028(8) 
C3 0.0242(8) 0.0316(10) 0.0196(8) 0.0045(8) -0.0010(7) -0.0007(8) 
C4 0.0229(8) 0.0237(8) 0.0208(8) 0.0017(7) 0.0007(7) -0.0014(8) 
C5 0.0201(8) 0.0231(8) 0.0168(7) -0.0006(7) 0.0019(7) -0.0021(7) 
C6 0.0255(9) 0.0207(9) 0.0210(9) -0.0029(7) -0.0011(8) -0.0010(7) 
C7 0.0241(9) 0.0219(8) 0.0204(8) -0.0003(7) 0.0016(7) -0.0008(8) 
C8 0.0206(8) 0.0197(8) 0.0182(8) 0.0008(7) 0.0012(7) -0.0003(8) 
C9 0.0247(8) 0.0212(8) 0.0192(8) -0.0001(7) 0.0002(7) -0.0001(8) 
C10 0.0207(8) 0.0220(8) 0.0206(9) 0.0013(7) 0.0030(7) 0.0006(8) 
C11 0.0259(9) 0.0245(9) 0.0205(9) 0.0043(7) 0.0021(7) 0.0015(8) 
C12 0.0284(9) 0.0288(10) 0.0167(8) -0.0015(7) 0.0010(7) -0.0006(8) 
C13 0.0241(9) 0.0249(9) 0.0228(9) -0.0007(8) 0.0038(7) -0.0007(8) 
C14 0.0387(10) 0.0234(9) 0.0222(9) 0.0004(8) 0.0018(8) -0.0005(8) 
C15 0.0474(12) 0.0325(10) 0.0347(11) -0.0079(9) -0.0028(10) -0.0057(10) 
C16 0.0226(8) 0.0231(8) 0.0229(9) 0.0015(7) 0.0009(7) 0.0006(8) 
C17 0.0229(8) 0.0254(8) 0.0251(9) -0.0046(8) 0.0042(8) -0.0018(8) 
C18 0.0287(10) 0.0262(9) 0.0271(10) -0.0033(7) 0.0015(8) -0.0057(8) 
C19 0.0301(9) 0.0220(9) 0.0194(8) 0.0030(7) -0.0006(7) 0.0016(8) 
C20 0.0302(9) 0.0210(8) 0.0235(9) 0.0048(7) 0.0050(8) 0.0032(8) 
C21 0.0292(9) 0.0186(8) 0.0233(9) 0.0014(7) 0.0081(8) 0.0012(8) 
C22 0.0333(10) 0.0239(8) 0.0222(9) 0.0002(7) 0.0050(8) -0.0026(9) 
C23 0.0530(13) 0.0303(10) 0.0309(10) -0.0047(8) 0.0083(10) 0.0070(10) 
C24 0.0226(8) 0.0215(8) 0.0208(9) 0.0030(7) 0.0021(7) 0.0003(8) 
C25 0.0198(8) 0.0230(8) 0.0174(8) 0.0007(7) 0.0027(7) 0.0000(7) 
C26 0.0233(8) 0.0218(8) 0.0196(8) 0.0017(7) -0.0004(7) 0.0034(8) 
C27 0.0247(8) 0.0234(8) 0.0182(8) -0.0001(7) -0.0011(7) 0.0004(8) 
  
_geom_special_details 
; 
 All esds (except the esd in the dihedral angle between two l.s. planes) 
 are estimated using the full covariance matrix.  The cell esds are taken 
 into account individually in the estimation of esds in distances, angles 
 and torsion angles; correlations between esds in cell parameters are only 
 used when they are defined by crystal symmetry.  An approximate (isotropic) 
 treatment of cell esds is used for estimating esds involving l.s. planes. 
; 
  
loop_ 
 _geom_bond_atom_site_label_1 
 _geom_bond_atom_site_label_2 
 _geom_bond_distance 
 _geom_bond_site_symmetry_2 
 _geom_bond_publ_flag 
S1 O2 1.4289(14) . ? 
S1 O1 1.4399(13) . ? 
S1 N1 1.6194(15) . ? 
S1 C5 1.7724(18) . ? 
N1 C6 1.473(2) . ? 
N1 H1 0.871(17) . ? 
C1 C2 1.506(3) . ? 
C1 H1A 0.9800 . ? 
C1 H1B 0.9800 . ? 
C1 H1C 0.9800 . ? 
C2 C17 1.393(3) . ? 
C2 C3 1.397(3) . ? 
C3 C4 1.381(3) . ? 
C3 H3 0.9500 . ? 
C4 C5 1.391(3) . ? 
C4 H4 0.9500 . ? 
C5 C16 1.386(3) . ? 
C6 C7 1.550(2) . ? 
C6 H6A 0.9900 . ? 
C6 H6B 0.9900 . ? 
C7 C21 1.510(3) . ? 
C7 C18 1.536(3) . ? 
C7 C8 1.557(2) . ? 
C8 C27 1.531(2) . ? 
C8 C9 1.560(2) . ? 
C8 H8 1.0000 . ? 
C9 C10 1.540(2) . ? 
C9 C19 1.541(3) . ? 
C9 C22 1.542(3) . ? 
C10 C11 1.403(3) . ? 
C10 C25 1.404(3) . ? 
C11 C12 1.378(3) . ? 
C11 H11 0.9500 . ? 
C12 C13 1.399(3) . ? 
C12 H12 0.9500 . ? 
C13 C24 1.391(3) . ? 
C13 C14 1.523(3) . ? 
C14 C15 1.522(3) . ? 
C14 C23 1.532(3) . ? 
C14 H14 1.0000 . ? 
C15 H15A 0.9800 . ? 
C15 H15B 0.9800 . ? 
C15 H15C 0.9800 . ? 
C16 C17 1.380(3) . ? 
C16 H16 0.9500 . ? 
C17 H17 0.9500 . ? 
C18 H18A 0.9800 . ? 
C18 H18B 0.9800 . ? 
C18 H18C 0.9800 . ? 
C19 C20 1.504(3) . ? 
C19 H19A 0.9900 . ? 
C19 H19B 0.9900 . ? 
C20 C21 1.322(3) . ? 
C20 H20 0.9500 . ? 
C21 H21 0.9500 . ? 
C22 H22A 0.9800 . ? 
C22 H22B 0.9800 . ? 
C22 H22C 0.9800 . ? 
C23 H23A 0.9800 . ? 
C23 H23B 0.9800 . ? 
C23 H23C 0.9800 . ? 
C24 C25 1.399(3) . ? 
C24 H24 0.9500 . ? 
C25 C26 1.520(2) . ? 
C26 C27 1.528(2) . ? 
C26 H26A 0.9900 . ? 
C26 H26B 0.9900 . ? 
C27 H27A 0.9900 . ? 
C27 H27B 0.9900 . ? 
  
loop_ 
 _geom_angle_atom_site_label_1 
 _geom_angle_atom_site_label_2 
 _geom_angle_atom_site_label_3 
 _geom_angle 
 _geom_angle_site_symmetry_1 
 _geom_angle_site_symmetry_3 
 _geom_angle_publ_flag 
O2 S1 O1 118.65(8) . . ? 
O2 S1 N1 106.45(8) . . ? 
O1 S1 N1 107.86(8) . . ? 
O2 S1 C5 109.33(8) . . ? 
O1 S1 C5 106.36(8) . . ? 
N1 S1 C5 107.76(8) . . ? 
C6 N1 S1 118.51(12) . . ? 
C6 N1 H1 117.7(19) . . ? 
S1 N1 H1 110.5(18) . . ? 
C2 C1 H1A 109.5 . . ? 
C2 C1 H1B 109.5 . . ? 
H1A C1 H1B 109.5 . . ? 
C2 C1 H1C 109.5 . . ? 
H1A C1 H1C 109.5 . . ? 
H1B C1 H1C 109.5 . . ? 
C17 C2 C3 118.04(17) . . ? 
C17 C2 C1 120.92(18) . . ? 
C3 C2 C1 121.03(18) . . ? 
C4 C3 C2 121.30(17) . . ? 
C4 C3 H3 119.3 . . ? 
C2 C3 H3 119.3 . . ? 
C3 C4 C5 119.12(17) . . ? 
C3 C4 H4 120.4 . . ? 
C5 C4 H4 120.4 . . ? 
C16 C5 C4 120.83(17) . . ? 
C16 C5 S1 119.54(14) . . ? 
C4 C5 S1 119.62(14) . . ? 
N1 C6 C7 113.08(15) . . ? 
N1 C6 H6A 109.0 . . ? 
C7 C6 H6A 109.0 . . ? 
N1 C6 H6B 109.0 . . ? 
C7 C6 H6B 109.0 . . ? 
H6A C6 H6B 107.8 . . ? 
C21 C7 C18 110.05(15) . . ? 
C21 C7 C6 107.77(15) . . ? 
C18 C7 C6 104.46(14) . . ? 
C21 C7 C8 110.50(15) . . ? 
C18 C7 C8 114.37(15) . . ? 
C6 C7 C8 109.34(14) . . ? 
C27 C8 C7 113.85(14) . . ? 
C27 C8 C9 110.64(14) . . ? 
C7 C8 C9 114.27(14) . . ? 
C27 C8 H8 105.7 . . ? 
C7 C8 H8 105.7 . . ? 
C9 C8 H8 105.7 . . ? 
C10 C9 C19 110.28(15) . . ? 
C10 C9 C22 107.67(14) . . ? 
C19 C9 C22 108.42(15) . . ? 
C10 C9 C8 108.98(14) . . ? 
C19 C9 C8 107.30(14) . . ? 
C22 C9 C8 114.19(15) . . ? 
C11 C10 C25 117.75(17) . . ? 
C11 C10 C9 119.19(16) . . ? 
C25 C10 C9 123.04(15) . . ? 
C12 C11 C10 121.97(17) . . ? 
C12 C11 H11 119.0 . . ? 
C10 C11 H11 119.0 . . ? 
C11 C12 C13 120.93(17) . . ? 
C11 C12 H12 119.5 . . ? 
C13 C12 H12 119.5 . . ? 
C24 C13 C12 117.30(17) . . ? 
C24 C13 C14 121.29(17) . . ? 
C12 C13 C14 121.37(16) . . ? 
C15 C14 C13 111.89(17) . . ? 
C15 C14 C23 110.68(17) . . ? 
C13 C14 C23 110.89(16) . . ? 
C15 C14 H14 107.7 . . ? 
C13 C14 H14 107.7 . . ? 
C23 C14 H14 107.7 . . ? 
C14 C15 H15A 109.5 . . ? 
C14 C15 H15B 109.5 . . ? 
H15A C15 H15B 109.5 . . ? 
C14 C15 H15C 109.5 . . ? 
H15A C15 H15C 109.5 . . ? 
H15B C15 H15C 109.5 . . ? 
C17 C16 C5 119.12(17) . . ? 
C17 C16 H16 120.4 . . ? 
C5 C16 H16 120.4 . . ? 
C16 C17 C2 121.58(17) . . ? 
C16 C17 H17 119.2 . . ? 
C2 C17 H17 119.2 . . ? 
C7 C18 H18A 109.5 . . ? 
C7 C18 H18B 109.5 . . ? 
H18A C18 H18B 109.5 . . ? 
C7 C18 H18C 109.5 . . ? 
H18A C18 H18C 109.5 . . ? 
H18B C18 H18C 109.5 . . ? 
C20 C19 C9 112.23(16) . . ? 
C20 C19 H19A 109.2 . . ? 
C9 C19 H19A 109.2 . . ? 
C20 C19 H19B 109.2 . . ? 
C9 C19 H19B 109.2 . . ? 
H19A C19 H19B 107.9 . . ? 
C21 C20 C19 123.97(17) . . ? 
C21 C20 H20 118.0 . . ? 
C19 C20 H20 118.0 . . ? 
C20 C21 C7 124.72(17) . . ? 
C20 C21 H21 117.6 . . ? 
C7 C21 H21 117.6 . . ? 
C9 C22 H22A 109.5 . . ? 
C9 C22 H22B 109.5 . . ? 
H22A C22 H22B 109.5 . . ? 
C9 C22 H22C 109.5 . . ? 
H22A C22 H22C 109.5 . . ? 
H22B C22 H22C 109.5 . . ? 
C14 C23 H23A 109.5 . . ? 
C14 C23 H23B 109.5 . . ? 
H23A C23 H23B 109.5 . . ? 
C14 C23 H23C 109.5 . . ? 
H23A C23 H23C 109.5 . . ? 
H23B C23 H23C 109.5 . . ? 
C13 C24 C25 122.57(17) . . ? 
C13 C24 H24 118.7 . . ? 
C25 C24 H24 118.7 . . ? 
C24 C25 C10 119.47(16) . . ? 
C24 C25 C26 118.51(16) . . ? 
C10 C25 C26 122.02(16) . . ? 
C25 C26 C27 112.72(14) . . ? 
C25 C26 H26A 109.0 . . ? 
C27 C26 H26A 109.0 . . ? 
C25 C26 H26B 109.0 . . ? 
C27 C26 H26B 109.0 . . ? 
H26A C26 H26B 107.8 . . ? 
C26 C27 C8 109.97(14) . . ? 
C26 C27 H27A 109.7 . . ? 
C8 C27 H27A 109.7 . . ? 
C26 C27 H27B 109.7 . . ? 
C8 C27 H27B 109.7 . . ? 
H27A C27 H27B 108.2 . . ? 
  
loop_ 
 _geom_hbond_atom_site_label_D 
 _geom_hbond_atom_site_label_H 
 _geom_hbond_atom_site_label_A 
 _geom_hbond_distance_DH 
 _geom_hbond_distance_HA 
 _geom_hbond_distance_DA 
 _geom_hbond_angle_DHA 
 _geom_hbond_site_symmetry_A 
N1 H1 O1  0.871(17) 2.196(19) 3.010(2) 155(2) 3_556 
  
_diffrn_measured_fraction_theta_max    0.992 
_diffrn_reflns_theta_full              65.00 
_diffrn_measured_fraction_theta_full   0.992 
_refine_diff_density_max    0.379 
_refine_diff_density_min   -0.275 
_refine_diff_density_rms    0.052 
