# Supplementary material for: Guided desaturation of unactivated aliphatics
Source: Springer Nature journal article supplement (doi:10.1038/nchem.1385), 2012-07-06
Supplement: 41557_2012_BFnchem1385_MOESM86_ESM.mol [file 41557_2012_BFnchem1385_MOESM86_ESM.mol]

  ChemDraw06131210492D

 32 35  0  0  0  0  0  0  0  0999 V2000
   -2.4997    1.5214    0.0000 C   0  0  0  0  0  0  0  0  0  0  0  0
   -2.4997    0.6959    0.0000 C   0  0  0  0  0  0  0  0  0  0  0  0
   -1.7843    0.2836    0.0000 C   0  0  0  0  0  0  0  0  0  0  0  0
   -1.0697    0.6959    0.0000 C   0  0  0  0  0  0  0  0  0  0  0  0
   -1.0697    1.5214    0.0000 C   0  0  0  0  0  0  0  0  0  0  0  0
   -1.7843    1.9346    0.0000 C   0  0  0  0  0  0  0  0  0  0  0  0
   -0.3551    0.2836    0.0000 C   0  0  0  0  0  0  0  0  0  0  0  0
    0.3603    0.6959    0.0000 C   0  0  0  0  0  0  0  0  0  0  0  0
    0.3603    1.5214    0.0000 C   0  0  0  0  0  0  0  0  0  0  0  0
   -0.3551    1.9346    0.0000 C   0  0  0  0  0  0  0  0  0  0  0  0
    1.0748    1.9346    0.0000 C   0  0  0  0  0  0  0  0  0  0  0  0
    1.0748    2.7600    0.0000 C   0  0  0  0  0  0  0  0  0  0  0  0
    0.3603    3.1724    0.0000 C   0  0  0  0  0  0  0  0  0  0  0  0
   -0.3551    2.7600    0.0000 C   0  0  0  0  0  0  0  0  0  0  0  0
   -1.3720   -0.4318    0.0000 C   0  0  0  0  0  0  0  0  0  0  0  0
   -1.0697   -0.0449    0.0000 H   0  0  0  0  0  0  0  0  0  0  0  0
    1.7873    3.1714    0.0000 C   0  0  0  0  0  0  0  0  0  0  0  0
    2.4997    2.7600    0.0000 C   0  0  0  0  0  0  0  0  0  0  0  0
    1.7873    3.9940    0.0000 C   0  0  0  0  0  0  0  0  0  0  0  0
   -1.0697    2.3440    0.0000 C   0  0  0  0  0  0  0  0  0  0  0  0
   -2.3660   -0.2981    0.0000 C   0  0  0  0  0  0  0  0  0  0  0  0
   -0.5465   -0.4318    0.0000 N   0  0  0  0  0  0  0  0  0  0  0  0
    0.2762   -1.8567    0.0000 C   0  0  0  0  0  0  0  0  0  0  0  0
    1.0988   -1.8567    0.0000 C   0  0  0  0  0  0  0  0  0  0  0  0
    1.5101   -2.5691    0.0000 C   0  0  0  0  0  0  0  0  0  0  0  0
    1.0988   -3.2816    0.0000 C   0  0  0  0  0  0  0  0  0  0  0  0
    0.2762   -3.2816    0.0000 C   0  0  0  0  0  0  0  0  0  0  0  0
   -0.1352   -2.5691    0.0000 C   0  0  0  0  0  0  0  0  0  0  0  0
    1.5101   -3.9940    0.0000 C   0  0  0  0  0  0  0  0  0  0  0  0
   -0.1352   -1.1443    0.0000 S   0  0  0  0  0  0  0  0  0  0  0  0
   -0.8476   -1.5556    0.0000 O   0  0  0  0  0  0  0  0  0  0  0  0
    0.5773   -0.7330    0.0000 O   0  0  0  0  0  0  0  0  0  0  0  0
  1  2  2  0      
  2  3  1  0      
  3  4  1  0      
  4  5  1  0      
  5  6  1  0      
  6  1  1  0      
  4  7  1  0      
  7  8  1  0      
  8  9  1  0      
  9 10  2  0      
 10  5  1  0      
  9 11  1  0      
 11 12  2  0      
 12 13  1  0      
 13 14  2  0      
 14 10  1  0      
 12 17  1  0      
  5 20  1  1      
  3 21  1  1      
  3 15  1  6      
 15 22  1  0      
  4 16  1  6      
 17 18  1  0      
 17 19  1  0      
 22 30  1  0      
 23 24  2  0      
 24 25  1  0      
 25 26  2  0      
 26 27  1  0      
 27 28  2  0      
 23 28  1  0      
 26 29  1  0      
 23 30  1  0      
 30 31  2  0      
 30 32  2  0      
M  END
